# Supplementary material
Source: publisher site journal article supplement (https://www.spandidos-publications.com/8647/downloadSupplementary)

Figure S1. Proof of transfection for CPEB1 knockdown and overexpression. (A) Western blot analysis confirming CPEB1 knockdown by si-CPEB1 compared with si-NC in HGC-27 cells. (B) Western blot analysis confirming CPEB1 overexpression by ovCPEB1 compared with empty vector control in AGS cells. Data are expressed as mean  $\pm$  SD (n=3). \*\*P<0.01. CPEB1, cytoplasmic polyadenylation element-binding protein 1; si, small interfering; NC, negative control; ov, overexpression.

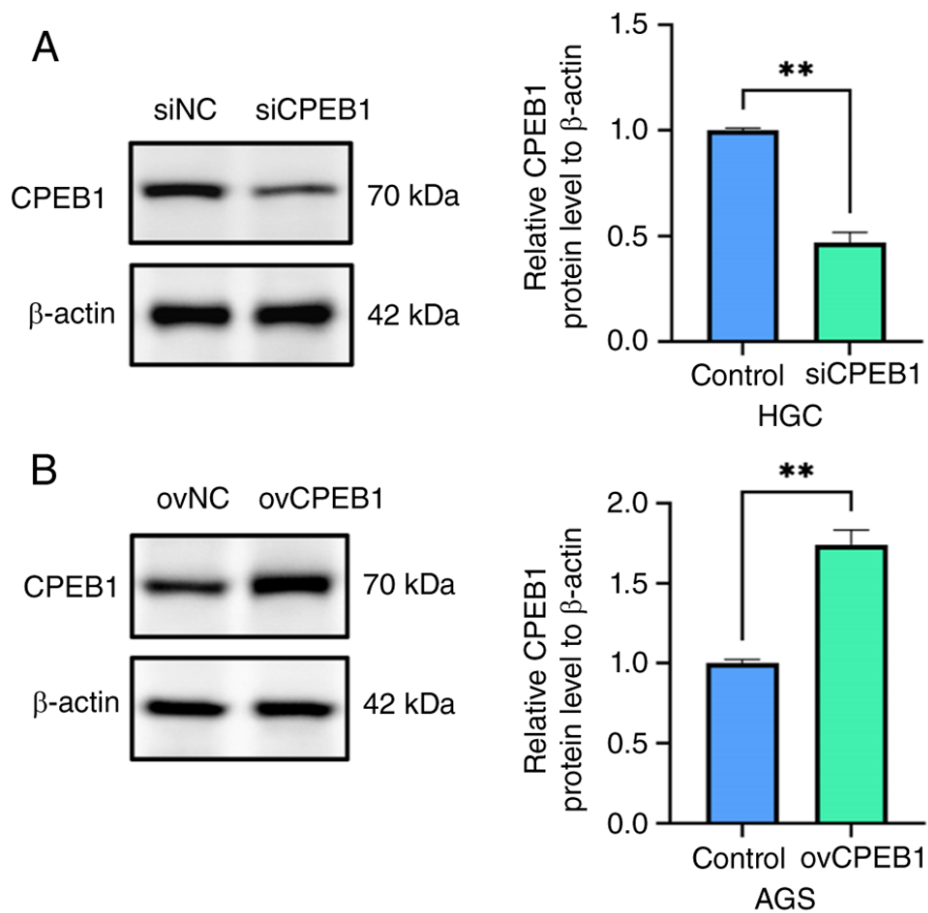

Supplement: Supplementary file 1 [file downloadSupplementary]
